# Supplementary material for: Segmental duplications in the silkworm genome
Source: PubMed Central journal article supplement (PMC3735471; doi:10.1186/1471-2164-14-521), 2013-07-31

Reads depth

transposable elements

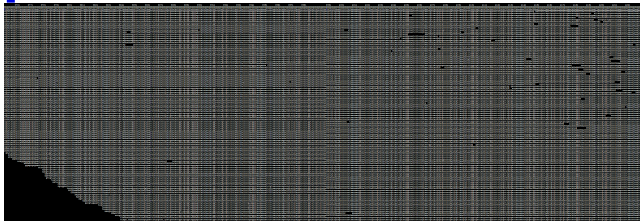

single copy in genome

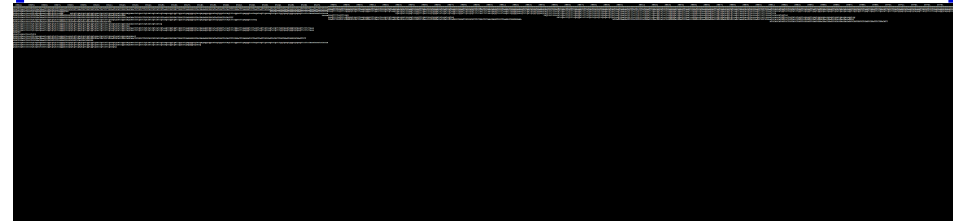

segmental duplications

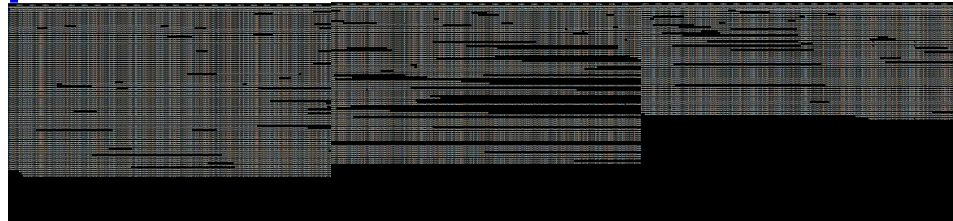

Supplement: 1471-2164-14-521-S7.pdf [file 1471-2164-14-521-S7.pdf]
