# Supplementary material for: Segmental duplications in the silkworm genome
Source: PubMed Central journal article supplement (PMC3735471; doi:10.1186/1471-2164-14-521), 2013-07-31
Supplement: 1471-2164-14-521-S10.pdf [file 1471-2164-14-521-S10.pdf]

(A)

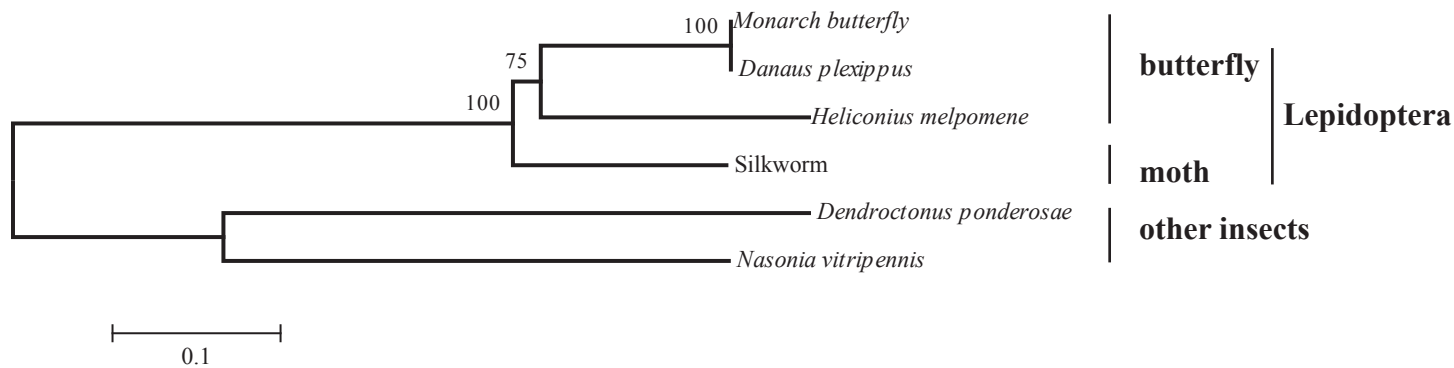

(B)

|                           |     |                                                                                                |                                               |
|---------------------------|-----|------------------------------------------------------------------------------------------------|-----------------------------------------------|
| Monarch                   | 1   | QDAMEEEKKPEERKISTGFPEPEKMDMDEILKVLEQLVLOQT-----DPSCELSLEPPLLP                                  | TDSVTRAAAILSHSISALFSRLERSHA                   |
| Danaus                    | 1   | QDAMEEEKKPEERKISTGFPEPEKMDMDEILKVLEQLVLOQT-----DPSCELSLEPPLLP                                  | TDSVTRAAAILSHSISALFSRLERSHA                   |
| Heliconius                | 1   | QETDEEEKKVEERKISSFFPEPELAMDILKVLEDLVIKTI-----DPSCDNLEPPLLP                                     | TDAVTRAAAILSHSMTALFARLERSHA                   |
| silkworm_BGIBMGA003910-PA | 1   | QDAADDEKKREPRKISTGFPEPEETPMDEILKLEELVIKTI-----DPSCELSLEPPLLP                                   | TDAVTRAAAILSHSISALFSRLERSHA                   |
| Dendroctonus              | 1   | PKTPTEN---VRRATVFLGLQKXHSNETIHSHELISTD-----EDG---DPPTALP                                       | LKTVAKLVMVSHSISAYCGSLEHSHLL                   |
| Nasonia                   | 1   | GTETEESG---TWNTPSGFL-LHFKAPELIFSSIQDLIVYEDAPQVVEEGKSEFSPITSLP                                  | PLTDAAKLALISHSVSAYAMSLPRSHA                   |
| Monarch                   | 83  | LGTHIATETTRWMAHFLRISDYDAFYHQEQLEGLVRVTRMLLHHKYPRYLEDGALAFS                                     | NRRLPSIYSCVASPLGVVQHLCRQLGLPLAC               |
| Danaus                    | 83  | LGTHIATETTRWMAHFLRISDYDAFYHQEQLEGLVRVTRMLLHHKYPRYLEDGALAFS                                     | NRRLPSIYSCVASPLGVVQHLCRQLGLPLAC               |
| Heliconius                | 83  | LGAHIASSETTRWMSHMFRLVDYNAFYHQEQLEGLVRVTRMLLHHRYPRYLEDGAMAFANRLPSIYSCVASPLGVVQHMCRLGLPLAC       |                                               |
| silkworm_BGIBMGA003910-PA | 83  | LGTHIASSETTRWMAHMFRLSDYNAFYHQEQLEGLVRVTRMLLHHRYPRYLEDG                                         |                                               |
| Dendroctonus              | 76  | LSLRFETDTRRWLSHIFGLLDSAFYHDDNLEGLVRVTRMLLHHRYPRYLEDG                                           | TLTFASSLPLIYSSISSPGLGVQYLCRQLGLPLAC           |
| Nasonia                   | 86  | TAGRLAADTTRWLSHIFRFVDCASSFHEDPLEGLVRVTRMLLHHRYPRYVDEGFTALASSPPLIYSSVAAPLGLVQHLCRQLSLPLHC       |                                               |
| Monarch                   | 173 | PVPVD---SSGKMDLNALDRLCEEDSAG--RTPLLVLGEAGEPPLGGGSPKALALAEI                                     | CGRRGVHLHVRGHALALPAAGCFEQT---V                |
| Danaus                    | 173 | PVPVD---SSGKMDLNALDRLCEEDSAG--RTPLLVLGEAGEPPLGGGSPKALALAEI                                     | CGRRGVHLHVRGHALALPAAGCFEQT---V                |
| Heliconius                | 173 | PVPVG---NNGKMDLALERLCEEDIAAN--RTPLLVLGEVGGPPLGFGSPKLTLRDI                                      | CSKRNDHLHVRGHSHALALPAALGRDOT---V              |
| silkworm_BGIBMGA003910-PA | 136 | ---GKMDLALERLCEEDVAAAN--RTPLLVLGEVGGPPLGFGSPKLTLYTLGEL                                         | CARRNDHLHVRGHALALPAGSLEKEQ---V                |
| Dendroctonus              | 166 | PVPVNTHFSGHYTMDVAALQKMLTDDGVITG--KVPLLVIADAGTPVTGHVDNARIKEL                                    | CKAHNCWLHVRGHHTLSALTLPNHTRNHAT                |
| Nasonia                   | 176 | EHPQNTMFGSRNSMDSIALERRLAEDSQSNVTPPLLLLAELAGSVLTGCHDNLNRLREI                                    | CDKHNVLWHVRGDSLALALTLNNSAKD-LSS               |
| Monarch                   | 255 | ADSLTLQPGPWFQIPGLPTVTFYKIPEPLTANDHSHKVVNSAS                                                    | SREGALAALGGLTAG--AARLALPLWTATRAAGAKRLARRIDAAF |
| Danaus                    | 255 | ADSLTLQPGPWFQIPGLPTVTFYKIPEPLTANDHSHKVVNSAS                                                    | SREGALAALGGLTAG--AARLALPLWTATRAAGAKRLARRIDAAF |
| Heliconius                | 256 | ADSLTLQPGPWFQIPGLPTVTFYKIPEPLTANDHSHKVVNSAS                                                    | SRESALAALSGLTAG--AARLALPLWTARAAGAKRLAKRIEISAV |
| silkworm_BGIBMGA003910-PA | 208 | -----A-----GAREGAAALSGLCA--AGRAALPLWVMARAAGAPALHGAALRAAF                                       |                                               |
| Dendroctonus              | 255 | ADSFITLGLGNWLGSN---INASKQKQVQ-----VSRESTLPLLAGLHNDHTSRRIITLPLWTALQSLGKDGWLSAIRENF              |                                               |
| Nasonia                   | 265 | ADSIITLPLGVWLGIPSLFVVTLVRLTDTRGA---R---PTSRDITLTLSLGMLADSLSRREPTLPLWTALQALGRDGIWNRFKQCF        |                                               |
| Monarch                   | 343 | ARTARALIAST-ELRLLSDRPGGDEPPNMDIVDAISE-----SSACVSFOFAPAGCA---DRPPPYDKLNSWLQVQLQREA              |                                               |
| Danaus                    | 343 | ARTARALIAST-ELRLLSDRPGGDEPPNMDIVDAISE-----SSACVSFOFAPAGCA---DRPPPYDKLNSWLQVQLQREA              |                                               |
| Heliconius                | 344 | ARAASVVFASA-DLRLSDRPGGDEPPNMDIVDAISO-----ASACVAFQFAPPG-E---ERPPPYDKLNSWLQVQLQREA               |                                               |
| silkworm_BGIBMGA003910-PA | 255 | ARTAYTLVAAA-GLTTLV-----E-----AVSQ-----ASACVAFQFAPPG-A---ERPPPYDKLNSWLQVQLQREA                  |                                               |
| Dendroctonus              | 329 | SERLYSALDVFRRVRLSPKPGG--ESGAYTTTELTSKPAISMLFESTACCVFQFIPDLAENEVLKVPYYPYDKLNSWLQVQLQISA         |                                               |
| Nasonia                   | 347 | VEELYSKTKKFNIRLLSQEPGG--ETGAYTTNELLSNPLNGPQLLEVVASALVFQFVPPPEADMQELQRVPPYYPYDKLNSWLQVQLQIRDI   |                                               |
| Monarch                   | 418 | INIEICETESYGVLRYCPLEGIFLE---EDRLSEWAAVLDLQHLVLTATVALREPFOKTLQTHPCRLRVHVPGWAGLGGVRYVPPGW        |                                               |
| Danaus                    | 418 | INIEICETESYGVLRYCPLEGIFLE---EDRLSEWAAVLDLQHLVLTATVALREPFOKTLQTHPCRLRVHVPGWAGLGGVRYVPPGW        |                                               |
| Heliconius                | 418 | ISIEVCETESHGVLRYCPLEGIMLD---DSQADACAARLDLQHLVLRATASLREPFQGVGRACRLRVHVNAGWAGLGGVRYVPPGW         |                                               |
| silkworm_BGIBMGA003910-PA | 314 | ISIEVCETESHGVLRYCPLEGISILE---EDKIESWSSILELQVHVLHATVALREPFQGVORVQNECLRNVHVPGWAGLGGVRYVPPGW      |                                               |
| Dendroctonus              | 418 | IPIEICELLEDVGVTLRECPFESALSDQPTLEQKFSFVQCLEQQLVLRATLHHKETFKTIVEASPVLSVELPDPWAGLGGVRYCPGW        |                                               |
| Nasonia                   | 436 | VEIEECHEIQVYCAIRNCPLESPECP--PNSDDVDVNVVACLREQIETLLLATVQHKETEFVKLVTEENDSLHVRVEMPGWAGLGGVRYAPPTW |                                               |
| Monarch                   | 505 | AP---LEELNSLNRQLVETLRATDGAFCGDDGDMACVRFMGVMTADTDVDELLDLVLSAGKDVEENSKALTDMEVLKKG-----           |                                               |
| Danaus                    | 505 | AP---LEELNSLNRQLVETLRATDGAFCGDDGDMACVRFMGVMTADTDVDELLDLVLSAGKDVEENSKALTDMEVLKKG-----           |                                               |
| Heliconius                | 505 | AP---KEELNALNRQLVETLRATDGAFCGDDGDMACVRFMGVMTADTDVDELLDLVLSAGKDVEENSKALTDMEVLKKGRSVVRO          |                                               |
| silkworm_BGIBMGA003910-PA | 401 | AP---LEQLNSLNRQLVETLRATDGAFCGDDGDMACVRFMGVMTADTDVDELLDLVLSAAGREVEESKALTDMEVLKKG-----           |                                               |
| Dendroctonus              | 508 | LLPDQLKEELNLNIALVDALKSVDSAFSLGEGQDGLICVRFMGMTFQSDVDEMLTLVHVQGSVEENSRVLDMSSEIVKKG-----          |                                               |
| Nasonia                   | 525 | VMTDQAKLEELNRLNTQLVETLRSTDAFSLGEGADGLACVRFMGVMTVDDTVAEILLSLVHQVGEVEEASSKLLDPMSEVVKRG-----      |                                               |
| Monarch                   | 583 | -----ISAAQEEELNR---SAWQEGLLRRVPPVGRVSVSWAP---POPFCGRRLLLTHGTLQATDDIYRFVQKDKKE--E               |                                               |
| Danaus                    | 583 | -----ISAAQEEELNR---SAWQEGLLRRVPPVGRVSVSWAP---POPFCGRRLLLTHGTLQATDDIYRFVQKDKKE--E               |                                               |
| Heliconius                | 591 | VYIIFILCAVHGTGKAHLELDC---INFVDGLLRVPPVGRVSVSWAP---PPFPAGRRLLLAHGTLQATDDIYRFVQKDKKE--E          |                                               |
| silkworm_BGIBMGA003910-PA | 479 | -----LEAAQADIERESLERLWQEGLLRRVPPVGRVSVSWAPS---AAPVGRRLLEASGTLQPTDDIYRLVQNKSKNDTE               |                                               |
| Dendroctonus              | 590 | -----IETARKDLQKNEERLWQEGLRHVPVGNFVNVWSPKTKETGVRGRSLNLTCQIVESTENIYKYHMQIQGTTF                   |                                               |
| Nasonia                   | 607 | -----LEAAQTDLRENAEKLWQEGLRHVPVVGTFVNVWSPSPKEGGVGRSLNLQAGVVESTENIYKYHMQIQPNSTT                  |                                               |
| Monarch                   | 651 | RA-----HSPTRQNTVP-----                                                                         |                                               |
| Danaus                    | 651 | RA-----HSPTRQNTVP-----                                                                         |                                               |
| Heliconius                | 672 | RA-----HSPTRKEKENQDIQ-----                                                                     |                                               |
| silkworm_BGIBMGA003910-PA | 554 | RA-----HSPTRAAPQH-----                                                                         |                                               |
| Dendroctonus              | 667 | GS--KSPPTPQIQTSVSN---HSRSSHASVSSQIRADAEPKPEVIAVKPPTDDVKGNSLVLVAIDSSSEKYARWKYS                  |                                               |
| Nasonia                   | 684 | GSGARTPPQPLVQTPVAGSQS--HSRSSHSSLSQSGKNLQSSTT--T--SAIQSPT-----QLTLPLVSKKEKPCELKS--              |                                               |
