# Supplementary material for: Segmental duplications in the silkworm genome
Source: PubMed Central journal article supplement (PMC3735471; doi:10.1186/1471-2164-14-521), 2013-07-31
Supplement: 1471-2164-14-521-S11.pdf [file 1471-2164-14-521-S11.pdf]

(A)

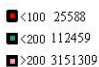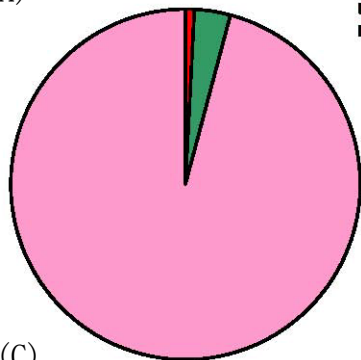

(B)

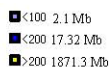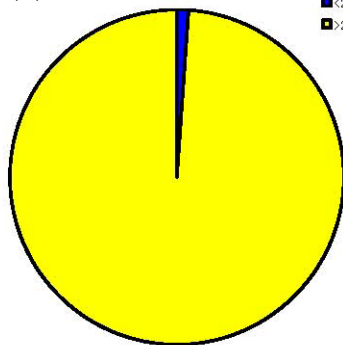

(C)

unique region validated by FISH

SDs validated by WSSD

TEs

SDs validated by WGAC

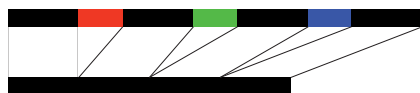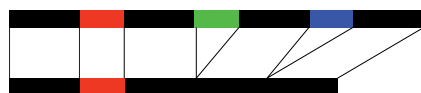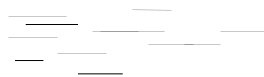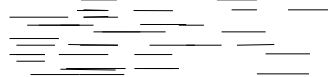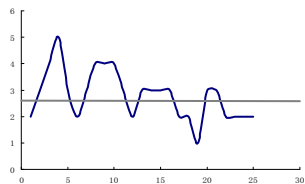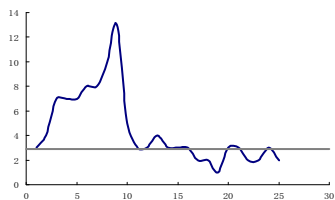

SD>mean+3\*STDEV

<

SD>mean+3\*STDEV
